# Supplementary material
Source: PubMed Central journal article supplement (PMC3561762)
Supplement: NIHMS433861-supplement-1_si_001.pdf [file NIHMS433861-supplement-1_si_001.pdf]

**Supplementary Information**

**From Phage Display to Nanoparticle Delivery: Functionalizing  
Nanoparticles with Multivalent Peptides Improves Targeting to a  
Cancer Biomarker**

**Bethany Powell Gray, Shunzi Li, and Kathlynn C. Brown\***

Department of Internal Medicine and The Simmons Comprehensive Cancer Center,  
University of Texas Southwestern Medical Center, 5323 Harry Hines Blvd., Dallas, TX  
75390-8807, USA

---

0

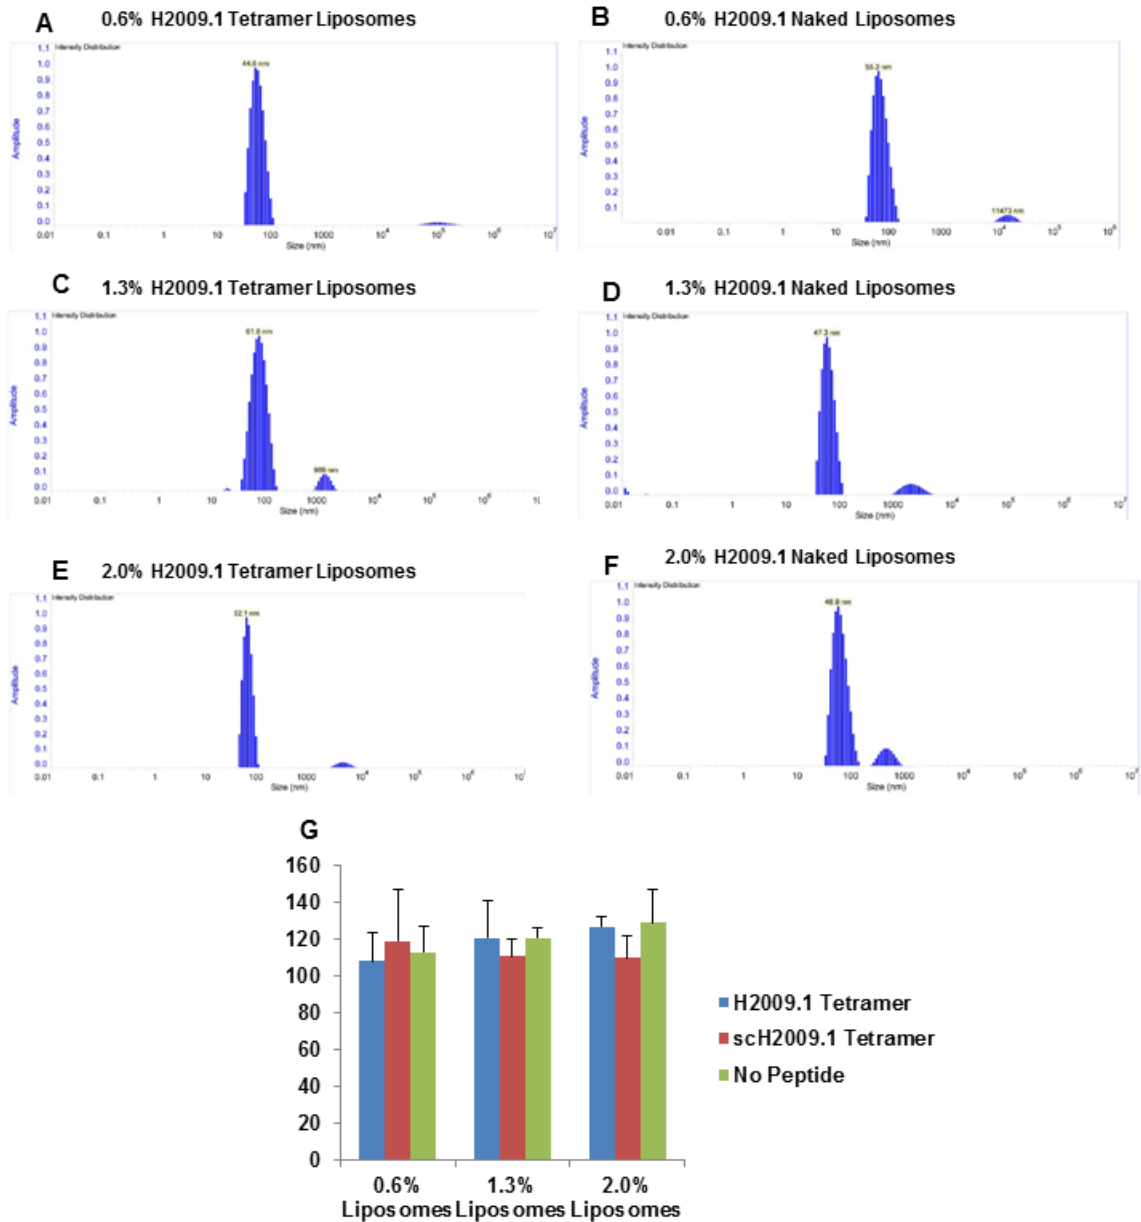

**Figure 1S.** *The liposomes are approximately 100 nm in diameter.* Representative intensity graphs displaying the size distribution of the liposomes as determined by dynamic light scattering. A: 0.6% H2009.1 tetrameric liposomes B: 0.6% naked liposomes C: 1.3% H2009.1 tetrameric liposomes D: 1.3% naked liposomes E: 2.0% H2009.1 tetrameric liposomes F: 2.0% naked liposomes G: Average diameter of the liposomes. Error bars represent standard deviation of at least 3 independent liposome preparations.

| Table S1. Liposome Formulations                  |       |      |      |
|--------------------------------------------------|-------|------|------|
| Formulation (molar percentages)                  |       |      |      |
| Lipid                                            | 0.64% | 1.3% | 2.0% |
| HSPC <sup>a</sup>                                | 65%   | 65%  | 65%  |
| Cholesterol                                      | 32%   | 32%  | 32%  |
| DSPE-PEG <sub>2000</sub> <sup>b</sup>            | 2.5%  | 1.9% | 1.2% |
| DSPE-PEG <sub>2000</sub> -Maleimide <sup>c</sup> | 0.64% | 1.3% | 2.0% |

<sup>a</sup> Hydrogenated soy phosphatidylcholine. <sup>b</sup> 1,2-distearoyl-*sn*-glycero-3-phosphoethanolamine-N-[carbonyl-methoxypolyethylene glycol-2000]. <sup>c</sup> 1,2-distearoyl-*sn*-glycero-3-phosphoethanolamine-N-[maleimide(polyethylene glycol)-2000].

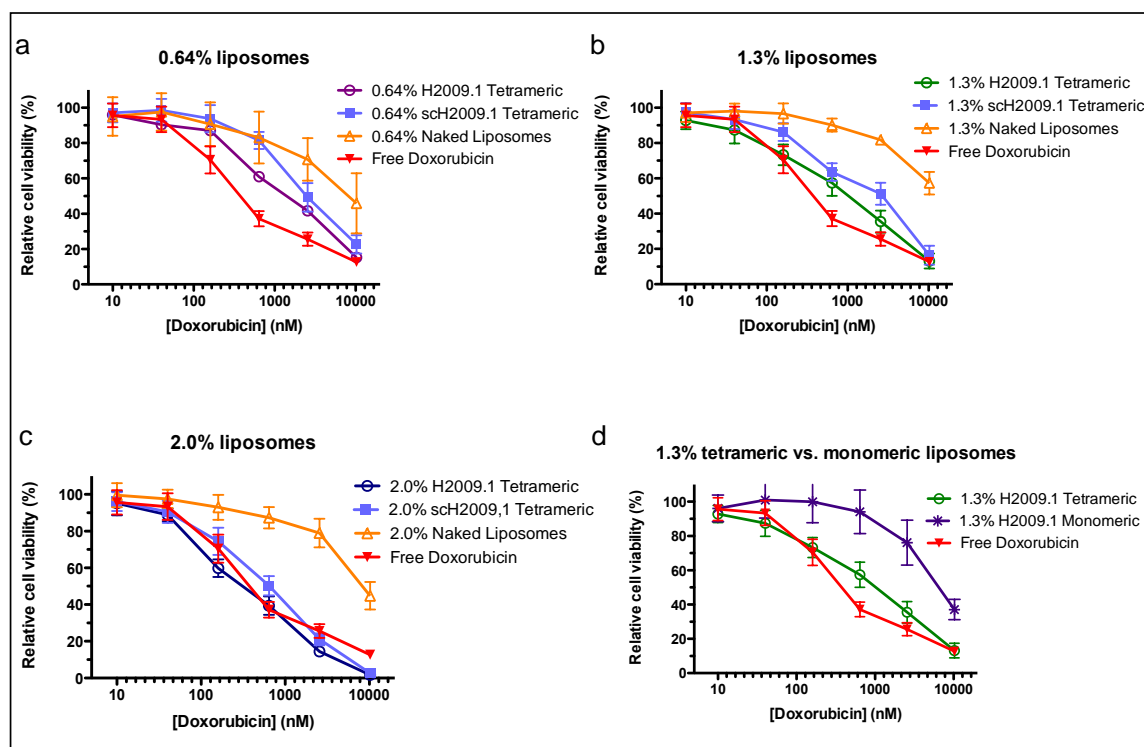

**Figure S2. H2009.1 tetrameric liposomes are selectively cytotoxic against  $\alpha_v\beta_6$ -expressing cells.** H2009 cells were incubated with liposomes for 1 hour before washing to remove non-internalized drug and adding fresh media. At 120 hours, cell viability was determined and normalized to non-treated cells using the ATP-based CellTiter-Glo® Luminescent Cell Viability Assay. (a-c) Viability for cells treated with tetrameric peptide liposomes. (d) Viability for cells treated with 1.3% H2009.1 tetrameric versus 1.3% H2009.1 monomeric liposomes.

**Table S2. IC<sub>50</sub> Values of Different Liposome Formulations on  $\alpha_v\beta_6$ -Negative H1299 Cells<sup>a</sup>**

| <b>Drug Formulation</b>   | <b>IC50 on H1299 cells (nM)</b> |
|---------------------------|---------------------------------|
| 1.3% H2009.1 Tetrameric   | 3700 ± 130                      |
| 1.3% scH2009.1 Tetrameric | 3500 ± 400                      |
| 1.3% Naked                | -                               |
| Free Doxorubicin          | 1400 ± 58                       |

<sup>a</sup> Cells were incubated with liposomes for 1 hour followed by a 120 hour recovery in media.
